# Supplementary material for: Biogeographic Patterns of Fungal Sub-Communities under Different Land-Use Types in Subtropical China
Source: MDPI journal article supplement (doi:10.3390/jof9060646), 2023-06-06
Supplement: s1 [file s1]

**Table S1** Sample Collection Information

| Samples | Longitude(E) | Latitude(N) | Vegetation cover | Cultivation History | Category      |
|---------|--------------|-------------|------------------|---------------------|---------------|
| S1      | 118.628934   | 30.820180   | paddy field      | >10 years           | tilled soil   |
| S2      | 118.649949   | 30.803800   | paddy field      | >10                 | tilled soil   |
| S3      | 119.272085   | 30.860087   | paddy field      | >10                 | tilled soil   |
| S4      | 119.517095   | 30.881888   | paddy field      | >10                 | tilled soil   |
| S5      | 119.188910   | 31.127631   | paddy field      | >10                 | tilled soil   |
| S6      | 119.038861   | 30.972781   | paddy field      | >10                 | tilled soil   |
| S7      | 118.158800   | 30.490595   | paddy field      | >10                 | tilled soil   |
| S8      | 118.432567   | 30.313183   | paddy field      | >10                 | tilled soil   |
| S9      | 118.603712   | 30.851279   | vegetable field  | 5                   | tilled soil   |
| S10     | 118.623375   | 30.811664   | vegetable field  | 2                   | tilled soil   |
| S11     | 118.671824   | 30.876421   | vegetable field  | 3                   | tilled soil   |
| S12     | 118.813986   | 31.026375   | vegetable field  | 4                   | tilled soil   |
| S13     | 118.929651   | 31.152928   | vegetable field  | 17                  | tilled soil   |
| S14     | 118.678963   | 30.089233   | orchards         | 7                   | tilled soil   |
| S15     | 118.998283   | 30.690122   | orchards         | 7                   | tilled soil   |
| S16     | 118.903259   | 30.714163   | orchards         | 2                   | tilled soil   |
| S17     | 118.599617   | 30.033812   | garden field     | 10                  | tilled soil   |
| S18     | 118.496767   | 30.175667   | garden field     | 10                  | tilled soil   |
| S19     | 118.719741   | 30.283900   | garden field     | 5                   | tilled soil   |
| S20     | 118.952063   | 30.512156   | woodland         | >10                 | untilled soil |
| S21     | 118.325851   | 30.247267   | woodland         | >10                 | untilled soil |
| S22     | 118.602819   | 30.839350   | woodland         | >10                 | untilled soil |
| S23     | 118.600996   | 30.813893   | woodland         | >10                 | untilled soil |
| S24     | 119.156651   | 31.050992   | woodland         | >10                 | untilled soil |
| S25     | 118.156902   | 30.486388   | woodland         | >10                 | untilled soil |
| S26     | 118.506733   | 30.451498   | woodland         | >10                 | untilled soil |
| S27     | 119.137628   | 31.106381   | woodland         | >10                 | untilled soil |
| S28     | 118.992295   | 31.211240   | woodland         | >10                 | untilled soil |
| S29     | 119.032652   | 31.222129   | woodland         | >10                 | untilled soil |
| S30     | 118.543230   | 30.834547   | woodland         | >10                 | untilled soil |
| S31     | 119.065350   | 30.484925   | woodland         | >10                 | untilled soil |
| S32     | 118.678849   | 30.295851   | woodland         | >10                 | untilled soil |
| S33     | 119.212328   | 30.844829   | woodland         | >10                 | untilled soil |
| S34     | 118.279967   | 30.570989   | dryland          | >10                 | untilled soil |
| S35     | 118.425717   | 30.696039   | dryland          | >10                 | untilled soil |
| S36     | 119.293499   | 31.088935   | dryland          | >10                 | untilled soil |
| S37     | 118.974233   | 31.215933   | dryland          | >10                 | untilled soil |
| S38     | 118.438067   | 30.117149   | grassland        | >10                 | untilled soil |
| S39     | 118.336612   | 30.248613   | grassland        | >10                 | untilled soil |
| S40     | 119.095727   | 30.532140   | grassland        | >10                 | untilled soil |
| S41     | 118.554117   | 30.256951   | grassland        | >10                 | untilled soil |
| S42     | 118.631885   | 30.169578   | wasteland        | >10                 | untilled soil |
| S43     | 118.641683   | 30.705467   | wasteland        | >10                 | untilled soil |
| S44     | 118.560569   | 30.723098   | wasteland        | >10                 | untilled soil |

**Note:**Each sampling site was sampled in two layers, with 44 sampling sites and a total of 88 samples.

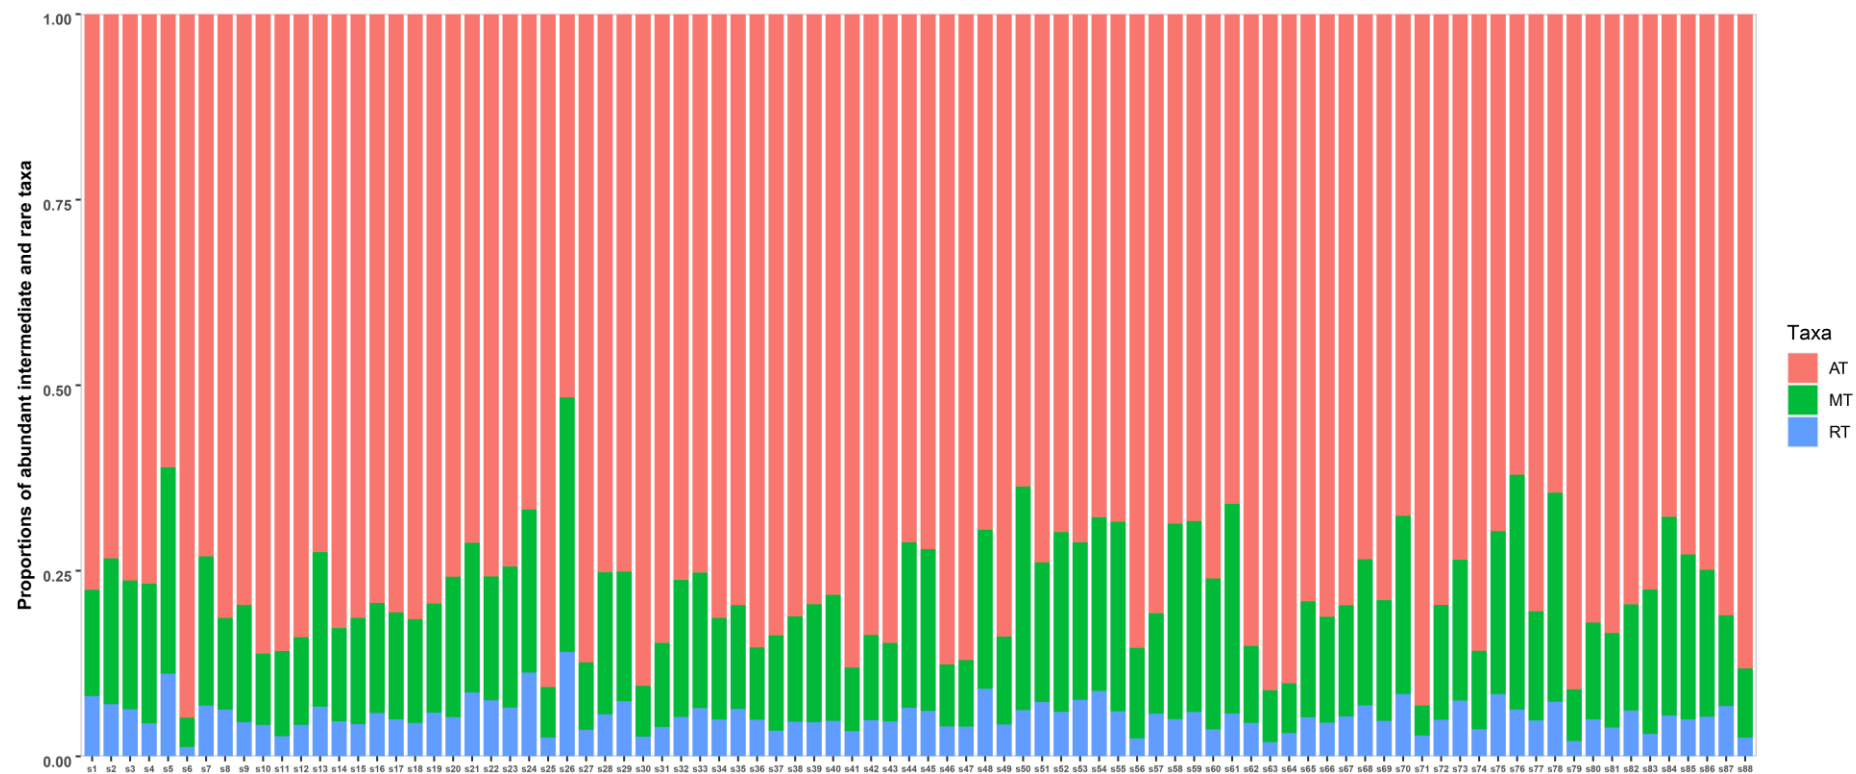

**Figure.S1** Proportions of abundant, intermediate and rare taxa in each sample; AT, abundant taxa; MT, intermediate taxa; RT, rare taxa.

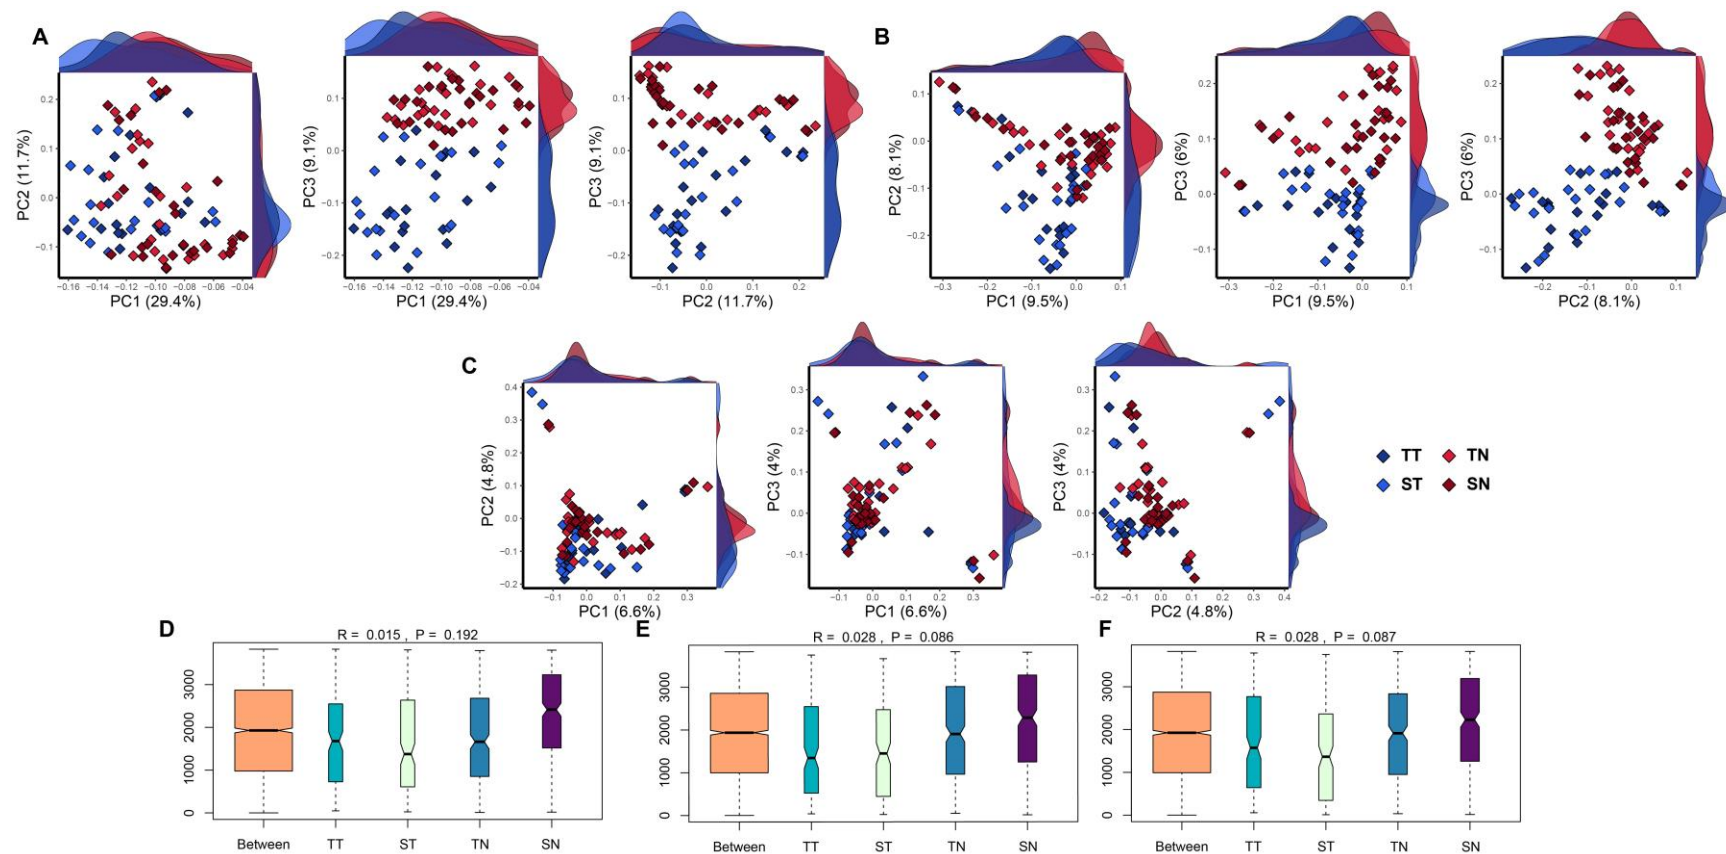

**Figure.S2** Differential analysis of the composition of three sub-communities in topsoil and subsoil layers of tilled and untilled lands. PCO analysis for abundant (A), intermediate (B), and rare (C) sub-communities. Analysis of similarities (ANOSIM) for abundant (D), intermediate (E), and rare (F) sub-communities. Tillage topsoil layer, TT; Tillage subsoil layer, ST; No-tillage topsoil layer, TN; No-tillage subsoil layer, SN.

**Table S2** Mantel test for fungal similarity and geographical distance

| <b>Treatments</b>          | <b>R</b> | <b><i>p</i></b> |
|----------------------------|----------|-----------------|
| Tilled soils               | -0.101   | < 0.001         |
| Untilled soils             | -0.313   | < 0.001         |
| Tilled abundant taxa       | -0.096   | < 0.001         |
| Untilled abundant taxa     | -0.285   | < 0.001         |
| Tilled intermediate taxa   | -0.101   | < 0.001         |
| Untilled intermediate taxa | -0.437   | < 0.001         |
| Tilled rare taxa           | -0.107   | < 0.001         |
| Untilled rare taxa         | -0.442   | < 0.001         |

**Table S3** Soil properties in different samples

| Soil properties | TT     |       |                           | NT     |       |              |
|-----------------|--------|-------|---------------------------|--------|-------|--------------|
|                 | Max    | Min   | Mean                      | Max    | Min   | Mean         |
| pH              | 7.38   | 4.68  | <b>5.65**</b>             | 7.29   | 4.17  | <b>5.28</b>  |
| TN (g/kg)       | 2.88   | 0.76  | <b>1.41*</b>              | 2.35   | 0.23  | <b>1.19</b>  |
| SOM (g/kg)      | 52.79  | 12.02 | <b>26.42<sup>ns</sup></b> | 74.97  | 2.54  | <b>26.40</b> |
| AP (mg/kg)      | 228.24 | 6.69  | <b>63.30***</b>           | 85.25  | 0.08  | <b>9.01</b>  |
| AK (mg/kg)      | 973.37 | 43.35 | <b>220.81***</b>          | 204.00 | 40.71 | <b>93.32</b> |
| TP (g/kg)       | 2.41   | 0.30  | <b>0.84***</b>            | 1.53   | 0.07  | <b>0.49</b>  |
| TK (g/kg)       | 79.41  | 10.61 | <b>23.35<sup>ns</sup></b> | 39.23  | 8.11  | <b>20.22</b> |

<sup>a</sup>TN, total nitrogen; SOM, soil organic matter; AP, available phosphorus; AK, available potassium; TP, total phosphorus; TK, total potassium;

<sup>b</sup>Soil properties are shown for tillage and non-tillage samples. The maximum value (Max), minimum value (Min) and mean value (Mean) are shown. An asterisk in the Mean columns indicates significant differences between tillage and no-tillage samples, at the 0.001\*\*\*, 0.01\*\*, and 0.05\* levels respectively.
